# Supplementary figures and images for: A site-isolated Lewis acidic aluminium and Brønsted basic amine sites in the dimeric silsesquioxane cage as a reusable homogeneous bifunctional catalyst for one-pot tandem deacetalization/deketalization-Knoevenagel condensation reactions
Source: Royal Society of Chemistry journal article supplement (doi:10.1039/d3nj00276d), 2023-01-01

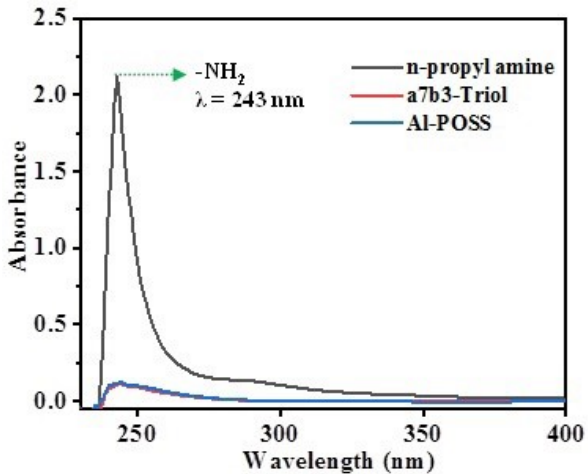

Supplement: d3nj00276d2.pdf [file d3nj00276d2.pdf]
